# Supplementary material
Source: PubMed Central journal article supplement (PMC5474749)
Supplement: NIHMS866990-supplement-1.pdf [file NIHMS866990-supplement-1.pdf]

**Supplementary Figure 1**

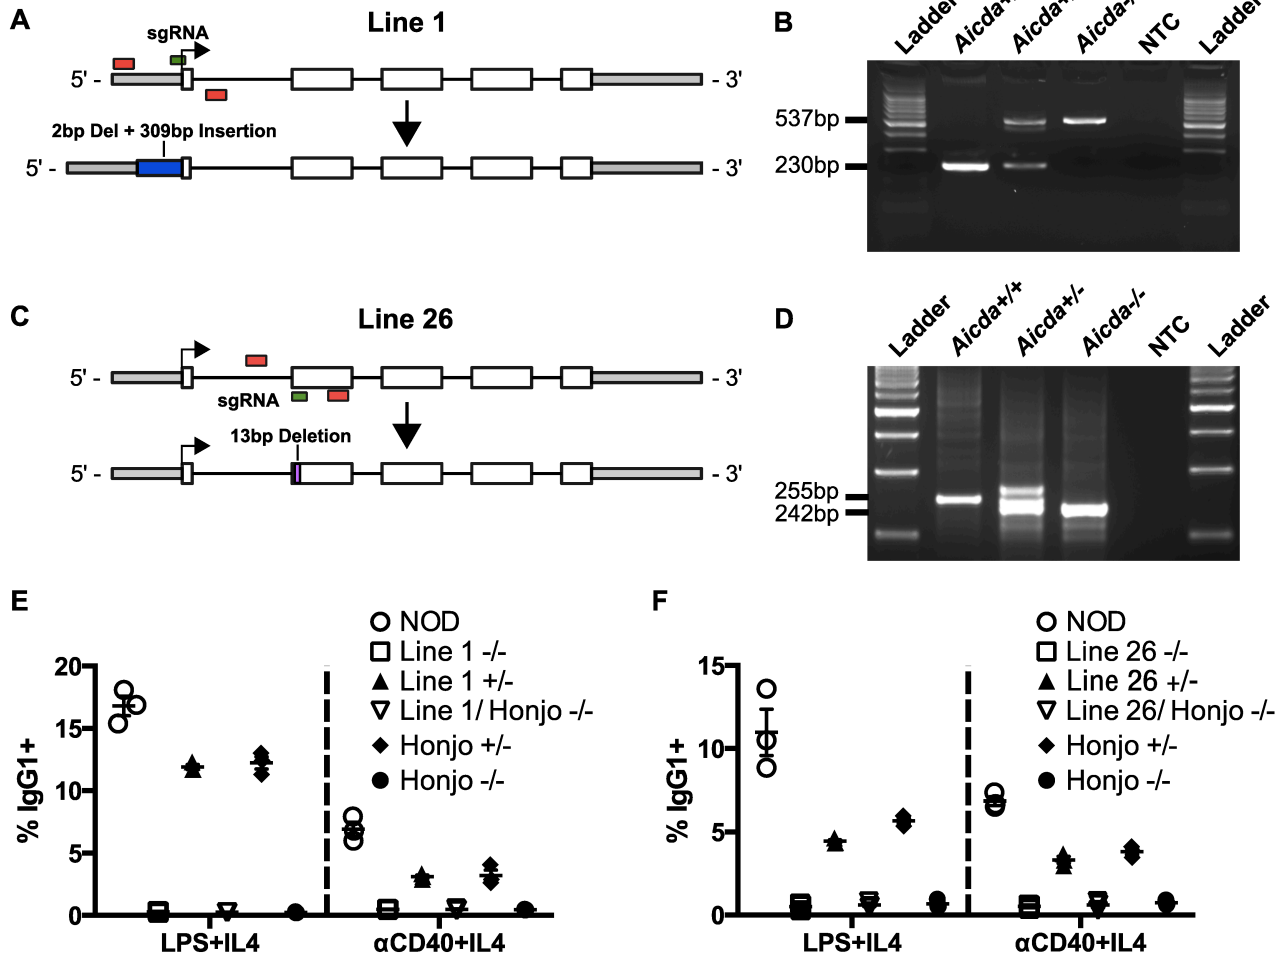

**Supplementary Figure 1: CRISPR/Cas9-mediated generation and verification of *Aicda*<sup>-/-</sup> NOD mice.** (A) Schematic diagram depicting *Aicda* gene structure and the locations of genotyping primers (red) and sgRNA (green) complementary sequences and 2bp deletion with 309bp insertion generated (blue) for NOD.*Aicda*<sup>-/-</sup> Line 1. (B) Representative image of genotyping for NOD.*Aicda*<sup>-/-</sup> Line 1. (C) Structure of *Aicda* and the locations of genotyping primers (red) and sgRNA (green) complementary sequences and 13bp deletion generated (pink) for NOD.*Aicda*<sup>-/-</sup> Line 26. (D) Representative image of genotyping for NOD.*Aicda*<sup>-/-</sup> Line 26. (E-F) Splenic B-lymphocytes purified from F1 offspring of NOD.*Aicda*<sup>-/-</sup> X B6.*Aicda*<sup>-/-</sup> (n=3 per genotype) were cultured for 96 hours under stimulation by murine IL-4 (25 ng/mL) and LPS (50  $\mu$ g/mL) or anti-CD40 (1  $\mu$ g/mL) for 96 hours then analyzed for isotype switching to IgG1 by flow cytometry for Line 1 (E) and Line 26 (F). Mann-Whitney analysis was used to calculate *p*-values. All scatter plots show Mean $\pm$ SEM.

Supplementary Figure 2

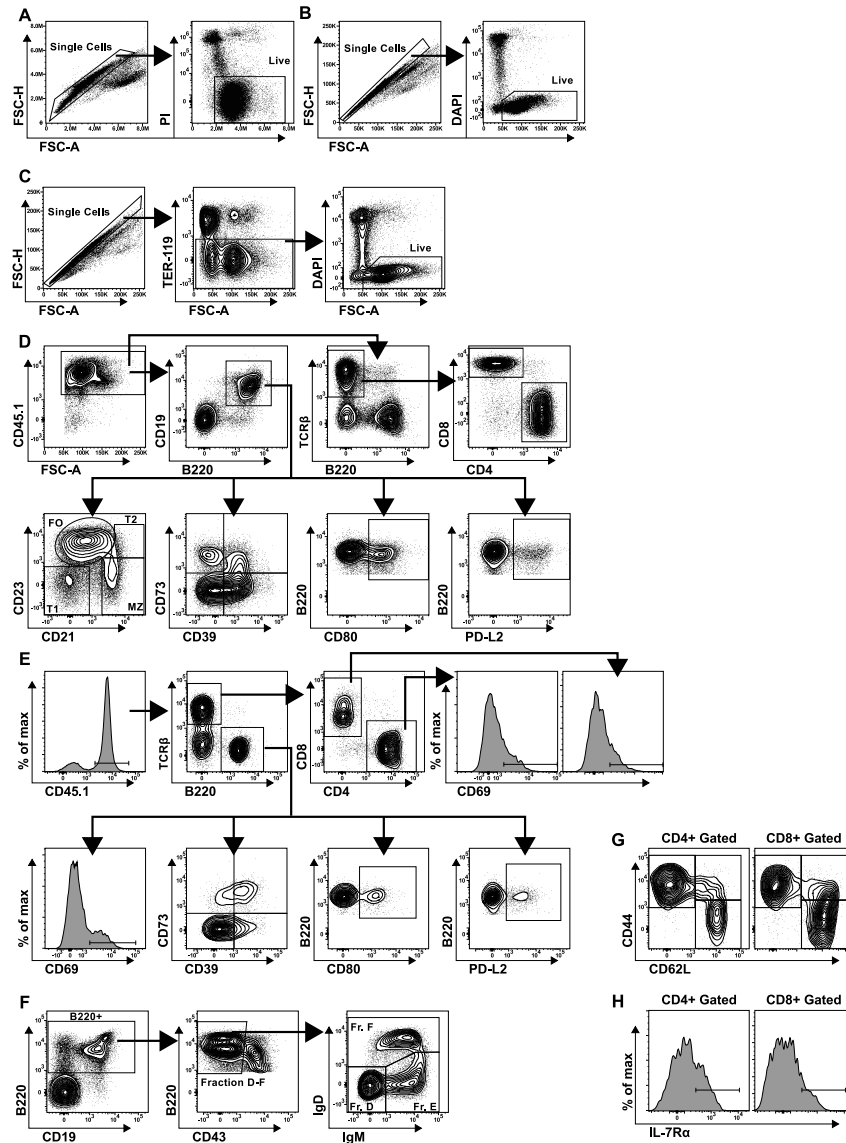

**Supplementary Figure 2: Flow cytometry gating strategies for identification of lymphocyte populations.**

Representative live cell gating using propidium iodide (PI, A) or DAPI (B) as a marker to exclude dead cells. Non-singlets are excluded as shown FSC-H vs FSC-A. Singlets are then shown PI or DAPI vs FSC-A and PI<sup>-</sup> or DAPI<sup>-</sup> cells are gated. (C) Representative live cell gating for spleen and PLN analysis of DIDS-treated mice. First, non-singlets are excluded as shown FSC-H vs FSC-A, then TER119<sup>-</sup> and DAPI<sup>-</sup> cells are gated as shown. (D) Representative gating strategy used to identify spleen and PLN T-cell and B-lymphocyte subsets was performed as follows: live singlets were first gated on CD45.1<sup>+</sup> to eliminate any non-leukocyte cells then B220<sup>+</sup> CD19<sup>+</sup> B-lymphocytes and TCRβ<sup>+</sup> B220<sup>-</sup> T-cells were gated as shown. CD4<sup>+</sup> and CD8<sup>+</sup> T-cell subsets were gated as shown. Splenic T1 (CD21<sup>-</sup> CD23<sup>+</sup>), T2 (CD21<sup>hi</sup> CD23<sup>+</sup>), Follicular (CD21<sup>+</sup> CD23<sup>+</sup>) and Marginal Zone (CD21<sup>hi</sup> CD23<sup>-</sup>) B-lymphocyte subsets were gated as shown. Spleen and PLN CD73<sup>+</sup> CD39<sup>-</sup>, CD73<sup>+</sup> CD39<sup>+</sup> and CD73<sup>-</sup> CD39<sup>-</sup>, CD80<sup>+</sup> and PD-L2<sup>+</sup> B-lymphocyte populations were gated as shown. (E) Representative gating strategy used to identify islet-infiltrating T-cell and B-lymphocyte populations was performed as follows: live singlets were first gated on CD45.1<sup>+</sup> to eliminate any non-leukocyte cells then B220<sup>+</sup> TCRβ<sup>-</sup> B-lymphocytes and TCRβ<sup>+</sup> B220<sup>-</sup> T-cells were gated as shown. CD4<sup>+</sup> and CD8<sup>+</sup> T-cell CD69 and IL-7Ra subsets were gated as shown. Among B-lymphocytes, CD69<sup>+</sup>, CD73<sup>+</sup> CD39<sup>-</sup>, CD73<sup>+</sup> CD39<sup>+</sup> and CD73<sup>-</sup> CD39<sup>-</sup>, CD80<sup>+</sup> and PD-L2<sup>+</sup> populations were gated as shown. (F) Representative gating strategy used to identify BM B-lymphocyte populations as follows: B220<sup>+</sup> cells are gated and further stratified for an absence of CD43 expression. Gated CD43<sup>-</sup> cells are shown as IgD vs IgM, and divided amongst Hardy Fractions D (IgM<sup>-</sup> IgD<sup>-</sup>), E (IgM<sup>+</sup> IgD<sup>-/low</sup>), or F (IgM<sup>+/low</sup> IgD<sup>+</sup>). (G-H) Representative gating strategy used to identify naïve (CD44<sup>-</sup> CD62L<sup>hi</sup>), effector (Eff, CD44<sup>+</sup> CD62L<sup>-</sup>) central memory (CM, CD44<sup>+</sup> CD62L<sup>hi</sup>) subsets (G) and IL-7Ra<sup>+</sup> (H) islet-infiltrating CD4<sup>+</sup> and CD8<sup>+</sup> T-cells.

### Supplementary Figure 3

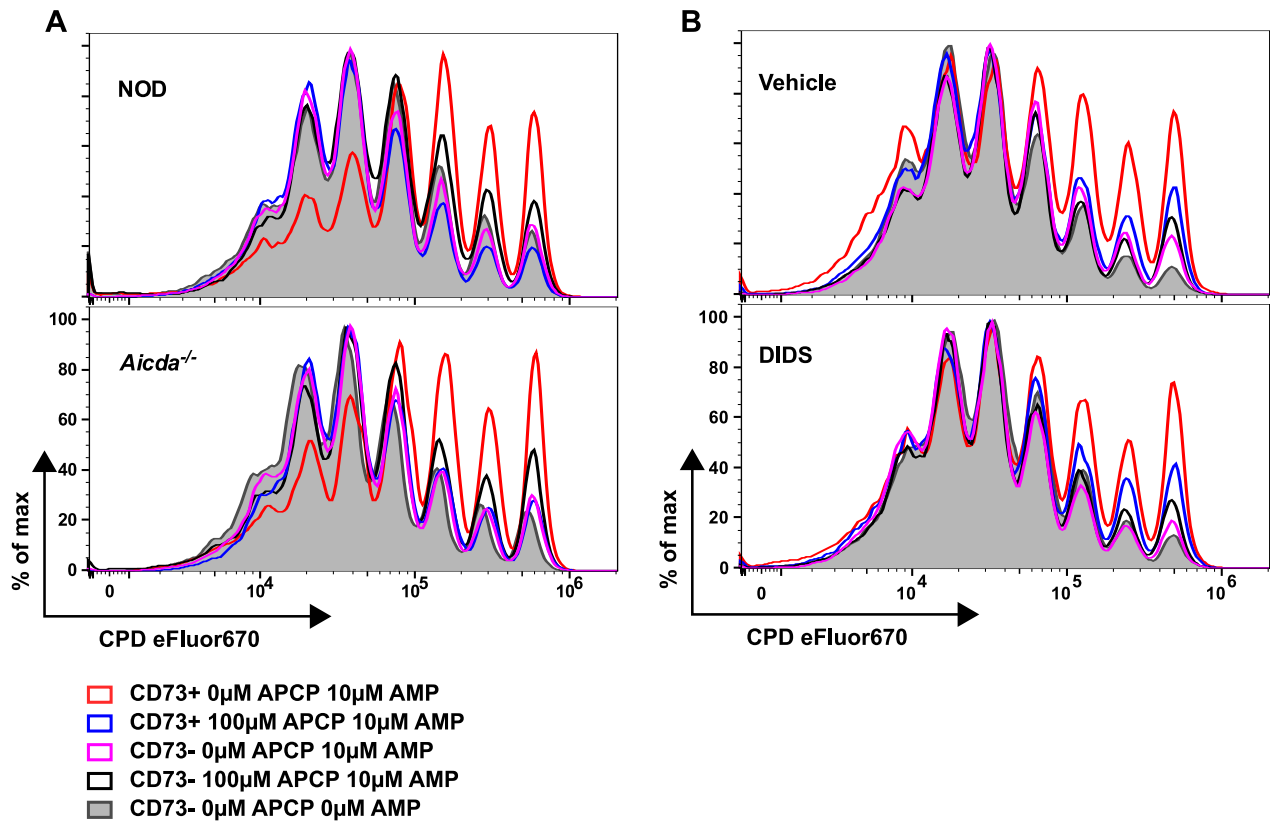

#### Supplementary Figure 3: CD73+ B-lymphocytes suppress T-cell proliferation.

(A) Representative flow cytometric histograms of  $1.0 \times 10^5$  CD73-depleted purified CD4<sup>+</sup> T-cells from 7-10 week-old male NOD mice labeled with Cell Proliferation Dye eFluor670 (CPD) and co-cultured for 4 days with  $1.0 \times 10^5$  CD73<sup>+</sup> or CD73<sup>-</sup> B-lymphocytes from pooled spleens of 7-10 week old male NOD (n=6 biological replicates) or NOD.*Aicda*<sup>-/-</sup> (n=10 biological replicates) mice under stimulation conditions consisting of soluble anti-CD40 (1 µg/mL), plate-bound anti-CD3ε (5 µg/mL) and soluble anti-CD28 (2 µg/mL) with 0 (baseline) or 10 µM AMP in the presence or absence of 100 µM APCP. (B) Representative flow cytometric histograms of  $1.0 \times 10^5$  CD73<sup>-</sup> NOD T-cells labeled with Cell Proliferation Dye (CPD) eFluor670 and co-cultured for 4 days with  $1.0 \times 10^5$  CD73<sup>+</sup> or CD73<sup>-</sup> B-lymphocytes from pooled spleens of vehicle (n=6 biological replicates) or DIDS treated (n=6 biological replicates) mice under stimulation conditions consisting of soluble anti-CD40 (1 µg/mL), plate-bound anti-CD3ε (5 µg/mL) and soluble anti-CD28 (2 µg/mL) with 0 (baseline) or 10 µM AMP in the presence or absence of 100 µM APCP.

## Supplementary Figure 4

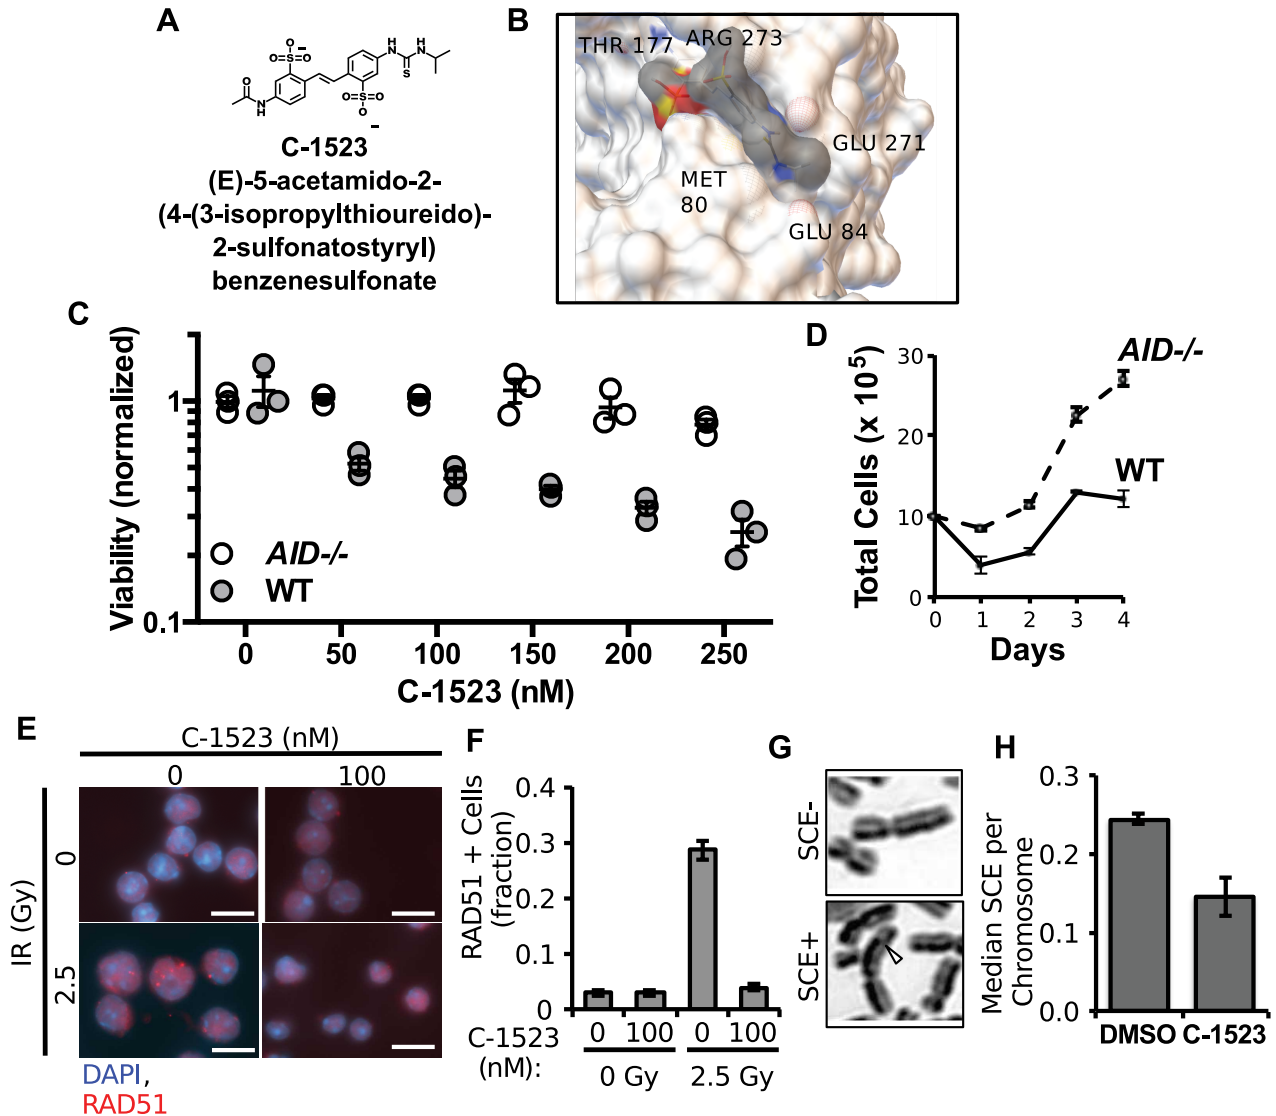

**Supplementary Figure 4: C-1523 inhibits RAD51 dependent homologous recombination.** (A) Chemical structure of C-1523, a derivative of DIDS. (B) Model of C-1523 binding to RAD51 monomer (1SZP) indicating the associated amino acid residues. The RAD51 structure was obtained from the Protein Data Bank (PDB) using the pdb code 1SZP. Only Chain A was used in the docking analysis. (C) WT and B6.*Aicda*<sup>-/-</sup> purified B-cells were incubated with  $\alpha$ CD40/IL-4 and with increasing dose of C-1523. Cells were counted via Trypan Blue exclusion test and normalized to vehicle (0 nM). (D) Graph showing total number of WT and B6.*Aicda*<sup>-/-</sup> purified B-cells at 100nM dose over a period of 4 days. (E) Representative images of RAD51 foci in primary cells. (F) Quantification of RAD51 by immunofluorescence in purified activated primary mouse B cells 24 h after 0 or 2.5 Gy IR and treatment with C-1523 (100 nM) or vehicle. (G) Representative images of metaphases from HEK293T-cells showing a positive sister chromatid exchange (SCE+) and an individual chromosome with no exchange (SCE-). A white arrow indicates the location of the exchange. HEK293T-cells were cultured with either vehicle (DMSO) or 100 nM C-1523 for three days. Cells were then incubated with 10  $\mu$ M BrdU for 44 hours. Colcemid was added to cultures for 30 min to 1 hour to induce metaphase arrest. After methanol/acetic acid fixation, slides were stained with Hoescht, exposed to UV, and then stained with Giemsa. Metaphase chromosomes were visualized by bright-field microscopy, and 20 metaphases were scored per sample. (H) Quantification of sister chromatid exchange observed in the metaphases of HEK293T-cells treated either with vehicle or 100nM C-1523. Twenty metaphases from three individual experiments were scored for each treatment.
